# Supplementary material for: A Polymorphism in the HLA-DPB1 Gene Is Associated with Susceptibility to Multiple Sclerosis
Source: PLOS journal article supplement (doi:10.1371/journal.pone.0013454), 2010-10-26
Supplement: S1 (10.1371/journal.pone.0013454.s001) [file journal.pone.0013454.s001]

Table S1. The 7-SNP model in the combined dataset, with two significant dominance effects and one significant SNP-SNP interaction added

| Term in model                  | $P$ value              | OR                |
|--------------------------------|------------------------|-------------------|
| rs2394160G                     | $2.2 \times 10^{-17}$  | 0.75              |
| rs2854050A                     | $6.9 \times 10^{-4}$   | 0.72              |
| rs3830041A                     | $2.2 \times 10^{-8}$   | 1.42              |
| rs3129939G                     | $1.9 \times 10^{-13}$  | 0.62              |
| rs9271366G                     | $4.7 \times 10^{-139}$ | 3.61              |
| rs2187668A                     | $3.5 \times 10^{-15}$  | 1.81              |
| rs9275535G                     | $1.5 \times 10^{-10}$  | 1.27              |
| rs9271366GG                    | 0.0014                 | 0.65 <sup>1</sup> |
| rs2187668AA                    | $3.6 \times 10^{-4}$   | 1.80 <sup>1</sup> |
| rs9271366G $\times$ rs2854050A | 0.0022                 | 0.66              |

<sup>1</sup>Odds ratios for dominance terms give the change in odds for minor-allele homozygotes, compared to what would be expected under a multiplicative model. Hence the estimated odds ratio for rs9271366GG homozygotes compared to rs9271366AA homozygotes is  $3.61 \times 3.61 \times 0.65 = 8.47$ .
